# Supplementary material for: Insecticide-Mediated Up-Regulation of Cytochrome P450 Genes in the Red Flour Beetle (Tribolium castaneum)
Source: MDPI journal article supplement (doi:10.3390/ijms16012078), 2015-01-19

## Supplementary Information

**Figure S1.** Probit analysis of insecticide bioassays. Each data point was calculated based on the average of at least three replicates (15 of 20-day old larvae in each replicate).

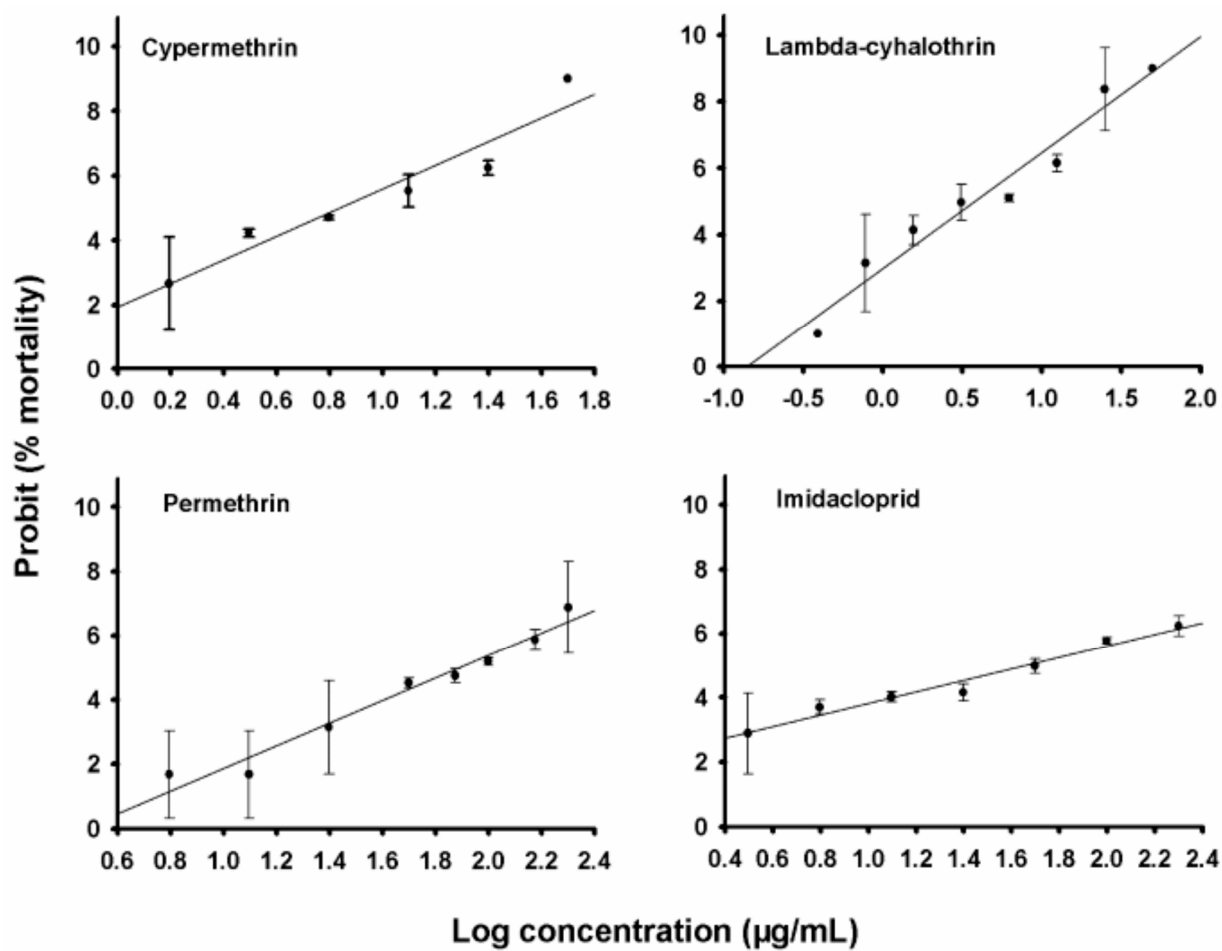

Supplement: s1 [file s1]
